# Supplementary material for: Plasma Ceramides and Sphingomyelins in Relation to Atrial Fibrillation Risk: The Cardiovascular Health Study
Source: PubMed Central journal article supplement — J Am Heart Assoc. 2020 Feb 5;9(4):e012853. doi: 10.1161/JAHA.119.012853 (PMC7070192; doi:10.1161/jaha.119.012853), 2020-02-05
Supplement: JAH3-9-e012853-s001.pdf [file JAH3-9-e012853-s001.pdf]

# **Supplemental Material**

**Table S1. Plasma concentrations and correlations of sphingolipid species.**

| Specie | Concentration ( $\mu\text{g/mL}$ ) |       |            |            |                                                            | Spearman correlation |        |        |        |       |       |       |       |
|--------|------------------------------------|-------|------------|------------|------------------------------------------------------------|----------------------|--------|--------|--------|-------|-------|-------|-------|
|        | Mean                               | SD    | 10th       | 90th       | Fold difference<br>between 90th<br>and 10th<br>percentiles | Cer-16               | Cer-20 | Cer-22 | Cer-24 | SM-16 | SM-20 | SM-22 | SM-24 |
|        |                                    |       | percentile | percentile |                                                            |                      |        |        |        |       |       |       |       |
| Cer-16 | 0.27                               | 0.06  | 0.20       | 0.34       | 1.7                                                        | 1.00                 |        |        |        |       |       |       |       |
| Cer-20 | 0.08                               | 0.03  | 0.05       | 0.12       | 2.3                                                        | 0.52                 | 1.00   |        |        |       |       |       |       |
| Cer-22 | 0.63                               | 0.19  | 0.41       | 0.86       | 2.1                                                        | 0.60                 | 0.60   | 1.00   |        |       |       |       |       |
| Cer-24 | 4.50                               | 1.08  | 3.25       | 5.89       | 1.8                                                        | 0.59                 | 0.49   | 0.87   | 1.00   |       |       |       |       |
| SM-16  | 125.30                             | 19.37 | 102.37     | 150.57     | 1.5                                                        | 0.45                 | 0.32   | 0.23   | 0.29   | 1.00  |       |       |       |
| SM-20  | 17.86                              | 3.57  | 13.54      | 22.41      | 1.7                                                        | 0.30                 | 0.36   | 0.46   | 0.47   | 0.49  | 1.00  |       |       |
| SM-22  | 26.86                              | 5.88  | 19.78      | 34.13      | 1.7                                                        | 0.34                 | 0.30   | 0.56   | 0.52   | 0.58  | 0.78  | 1.00  |       |
| SM-24  | 14.41                              | 3.54  | 10.31      | 18.86      | 1.8                                                        | 0.29                 | 0.10   | 0.39   | 0.48   | 0.54  | 0.66  | 0.90  | 1.00  |

Cer denotes ceramide; SM, sphingomyelin

**Table S2. Risk of incident atrial fibrillation per two-fold higher sphingolipid level.**

|        | Model 1 |              |         | Model 2 |              |        | Model 3 |              |         |
|--------|---------|--------------|---------|---------|--------------|--------|---------|--------------|---------|
|        | HR      | 95% CI       | p       | HR      | 95% CI       | p      | HR      | 95% CI       | p       |
| Cer-16 | 1.04    | (0.86, 1.25) | 0.6762  | 1.01    | (0.83, 1.23) | 0.8880 | 1.31    | (1.03, 1.66) | 0.0274  |
| Cer-20 | 0.82    | (0.72, 0.93) | 0.0015  | 0.78    | (0.68, 0.90) | 0.0004 | 0.72    | (0.61, 0.84) | <0.0001 |
| Cer-22 | 0.85    | (0.74, 0.99) | 0.0312  | 0.80    | (0.68, 0.94) | 0.0058 | 0.71    | (0.59, 0.86) | 0.0004  |
| Cer-24 | 0.81    | (0.68, 0.96) | 0.0173  | 0.77    | (0.64, 0.92) | 0.0052 | 0.67    | (0.54, 0.83) | 0.0003  |
| SM-16  | 1.00    | (0.76, 1.32) | 0.9999  | 1.12    | (0.82, 1.55) | 0.4724 | 1.73    | (1.18, 2.55) | 0.0051  |
| SM-20  | 0.62    | (0.50, 0.76) | <0.0001 | 0.64    | (0.51, 0.81) | 0.0002 | 0.55    | (0.43, 0.71) | <0.0001 |
| SM-22  | 0.73    | (0.60, 0.88) | 0.0010  | 0.74    | (0.60, 0.91) | 0.0049 | 0.60    | (0.46, 0.77) | 0.0001  |
| SM-24  | 0.80    | (0.68, 0.95) | 0.0118  | 0.85    | (0.71, 1.02) | 0.0840 | 0.76    | (0.61, 0.94) | 0.0124  |

Model 1 includes adjustment for age, sex, race, and study site; Model 2 includes Model 1 adjustment terms and additional adjustment for body mass index, systolic blood pressure, treated hypertension, smoking, alcohol use, high-density lipoprotein, low-density lipoprotein, PR-interval, and prevalent diabetes, heart failure, and history of myocardial infarction; in model 3, Cer-16 and SM-16 include adjustment for Cer-22 and SM-22, respectively; Cer-20, -22, -24, and SM-20, -22, and -24 include adjustment for Cer-16 and SM-16, respectively. Significance was evaluated as  $p < 0.0063$ . HR denotes hazard ratio; CI, confidence interval; Cer, ceramide; SM, sphingomyelin.

**Table S3. Risk of incident atrial fibrillation per two-fold higher sphingolipid, adjusted for additional biomarkers.**

|        | CRP (n=3,847) |              |         | Fibrinogen (n=3,858) |              |         | NT-proBNP (n=3,415) |              |        | Troponin T (n=3,414) |              |        |
|--------|---------------|--------------|---------|----------------------|--------------|---------|---------------------|--------------|--------|----------------------|--------------|--------|
|        | HR            | 95% CI       | p       | HR                   | 95% CI       | p       | HR                  | 95% CI       | p      | HR                   | 95% CI       | p      |
| Cer-16 | 1.25          | (0.98, 1.61) | 0.0766  | 1.29                 | (1.00, 1.65) | 0.0464  | 1.00                | (0.77, 1.31) | 0.9810 | 1.16                 | (0.89, 1.51) | 0.2677 |
| Cer-20 | 0.72          | (0.61, 0.85) | 0.0001  | 0.71                 | (0.61, 0.84) | <0.0001 | 0.82                | (0.69, 0.97) | 0.0246 | 0.74                 | (0.62, 0.88) | 0.0007 |
| Cer-22 | 0.69          | (0.56, 0.84) | 0.0002  | 0.69                 | (0.56, 0.84) | 0.0002  | 0.86                | (0.69, 1.06) | 0.1520 | 0.70                 | (0.56, 0.86) | 0.0006 |
| Cer-24 | 0.63          | (0.50, 0.79) | 0.0001  | 0.65                 | (0.51, 0.81) | 0.0002  | 0.82                | (0.64, 1.05) | 0.1089 | 0.65                 | (0.51, 0.83) | 0.0005 |
| SM-16  | 1.94          | (1.30, 2.88) | 0.0011  | 1.80                 | (1.21, 2.69) | 0.0037  | 1.12                | (0.72, 1.72) | 0.6209 | 1.62                 | (1.05, 2.48) | 0.0279 |
| SM-20  | 0.56          | (0.43, 0.73) | <0.0001 | 0.58                 | (0.45, 0.76) | 0.0001  | 0.79                | (0.59, 1.05) | 0.1001 | 0.62                 | (0.47, 0.82) | 0.0008 |
| SM-22  | 0.56          | (0.43, 0.73) | <0.0001 | 0.60                 | (0.46, 0.79) | 0.0002  | 0.86                | (0.65, 1.15) | 0.3167 | 0.65                 | (0.49, 0.86) | 0.0027 |
| SM-24  | 0.71          | (0.56, 0.89) | 0.0030  | 0.75                 | (0.59, 0.94) | 0.0115  | 0.96                | (0.75, 1.23) | 0.7473 | 0.78                 | (0.62, 1.00) | 0.0471 |

Each line represents four separate models; one for each biomarker. Models include adjustment for age, sex, race, study site, body mass index, systolic blood pressure, treated hypertension, smoking, alcohol use, high-density lipoprotein, low-density lipoprotein, PR-interval, and prevalent diabetes, heart failure, and history of myocardial infarction; Cer-16 and SM-16 include adjustment for Cer-22 and SM-22, respectively; Cer-20, -22, -24, and SM-20, -22, and -24 include adjustment for Cer-16 and SM-16, respectively. HR denotes hazard ratio; CI, confidence interval, Cer, ceramide; SM, sphingomyelin; CRP, C-reactive protein; NT-proBNP, N-terminal prohormone of brain natriuretic peptide.

**Table S4. Beta coefficients and 95% confidence intervals for interactions terms of sphingolipids with age, sex, BMI, race, and prevalent CHD in Cox regression models of incident atrial fibrillation.**

|        | Age interaction |               |      | Sex interaction |               |      | BMI interaction |               |      | Race interaction |               |      | CHD interaction |               |      |
|--------|-----------------|---------------|------|-----------------|---------------|------|-----------------|---------------|------|------------------|---------------|------|-----------------|---------------|------|
|        | Beta            | 95% CI        | p    | Beta            | 95% CI        | p    | Beta            | 95% CI        | p    | Beta             | 95% CI        | p    | Beta            | 95% CI        | p    |
| Cer-16 | 0.00            | (-0.03, 0.03) | 0.96 | -0.02           | (-0.39, 0.36) | 0.92 | 0.01            | (-0.04, 0.05) | 0.80 | 0.1              | (-0.51, 0.72) | 0.74 | -0.23           | (-0.66, 0.20) | 0.29 |
| Cer-20 | 0.00            | (-0.02, 0.03) | 0.75 | 0.11            | (-0.13, 0.36) | 0.37 | -0.01           | (-0.04, 0.01) | 0.35 | 0.12             | (-0.23, 0.46) | 0.51 | 0.17            | (-0.11, 0.45) | 0.24 |
| Cer-22 | 0.01            | (-0.02, 0.04) | 0.40 | -0.14           | (-0.42, 0.14) | 0.33 | 0.00            | (-0.03, 0.04) | 0.78 | 0.32             | (-0.16, 0.79) | 0.19 | 0.14            | (-0.19, 0.46) | 0.41 |
| Cer-24 | 0.01            | (-0.02, 0.05) | 0.38 | -0.10           | (-0.45, 0.25) | 0.58 | 0.02            | (-0.02, 0.06) | 0.36 | 0.59             | (0.00, 1.18)  | 0.05 | 0.06            | (-0.34, 0.45) | 0.78 |
| SM-16  | -0.02           | (-0.07, 0.03) | 0.46 | 0.62            | (0.08, 1.16)  | 0.03 | 0.06            | (-0.00, 0.12) | 0.06 | 0.71             | (-0.07, 1.48) | 0.07 | -0.22           | (-0.80, 0.37) | 0.47 |
| SM-20  | 0.01            | (-0.03, 0.05) | 0.53 | 0.45            | (0.04, 0.86)  | 0.03 | 0.01            | (-0.03, 0.06) | 0.55 | 0.26             | (-0.32, 0.83) | 0.38 | 0.19            | (-0.28, 0.65) | 0.43 |
| SM-22  | 0.02            | (-0.02, 0.05) | 0.39 | 0.32            | (-0.05, 0.70) | 0.09 | 0.01            | (-0.02, 0.05) | 0.48 | 0.4              | (-0.11, 0.91) | 0.13 | -0.12           | (-0.54, 0.30) | 0.57 |
| SM-24  | 0.01            | (-0.02, 0.05) | 0.41 | 0.20            | (-0.13, 0.54) | 0.24 | 0.01            | (-0.03, 0.05) | 0.58 | 0.3              | (-0.17, 0.78) | 0.22 | -0.25           | (-0.61, 0.12) | 0.19 |

Models includes adjustment for age, sex, race, study site, body mass index, systolic blood pressure, treated hypertension, smoking, alcohol use, HDL, LDL, PR-interval, and prevalent diabetes, heart failure, and history of myocardial infarction; Cer-16 and SM-16 include adjustment for Cer-22 and SM-22, respectively; Cer-20, -22, -24, and SM-20, -22, and -24 include adjustment for Cer-16 and SM-16, respectively. Cer denotes ceramide; SM, sphingomyelin; BMI, body mass index; CHD, coronary heart disease; CI, confidence interval

**Table S5. Risk of incident atrial fibrillation in subset of participants with plasma phospholipid fatty acid measures at 1992-93 (n=3,230), with and without adjustment for plasma phospholipid fatty acids.**

|        | correlation with corresponding saturated fatty acid* | Primary model |              |        | Primary model with adjustment for corresponding phospholipid saturated fatty acid |              |        |
|--------|------------------------------------------------------|---------------|--------------|--------|-----------------------------------------------------------------------------------|--------------|--------|
|        |                                                      | HR            | 95% CI       | p      | HR                                                                                | 95% CI       | p      |
| Cer-16 | 0.00                                                 | 1.47          | (1.12, 1.93) | 0.005  | 1.42                                                                              | (1.09, 1.87) | 0.010  |
| Cer-20 | 0.29                                                 | 0.67          | (0.56, 0.80) | <0.001 | 0.68                                                                              | (0.57, 0.82) | <0.001 |
| Cer-22 | 0.26                                                 | 0.64          | (0.52, 0.80) | <0.001 | 0.67                                                                              | (0.54, 0.83) | <0.001 |
| Cer-24 | 0.21                                                 | 0.58          | (0.46, 0.75) | <0.001 | 0.60                                                                              | (0.47, 0.77) | <0.001 |
| SM-16  | -0.21                                                | 1.78          | (1.16, 2.72) | 0.008  | 1.82                                                                              | (1.19, 2.79) | 0.006  |
| SM-20  | 0.46                                                 | 0.55          | (0.41, 0.73) | <0.001 | 0.57                                                                              | (0.42, 0.78) | <0.001 |
| SM-22  | 0.51                                                 | 0.58          | (0.43, 0.77) | <0.001 | 0.63                                                                              | (0.46, 0.85) | 0.003  |
| SM-24  | 0.55                                                 | 0.74          | (0.58, 0.94) | 0.015  | 0.79                                                                              | (0.61, 1.03) | 0.088  |

Models includes adjustment for age, sex, race, study site, body mass index, systolic blood pressure, treated hypertension, smoking, alcohol use, high-density lipoprotein, low-density lipoprotein, PR-interval, and prevalent diabetes, heart failure, and history of myocardial infarction; Cer-16 and SM-16 include adjustment for Cer-22 and SM-22, respectively; Cer-20, -22, -24, and SM-20, -22, and -24 include adjustment for Cer-16 and SM-16, respectively. HR denotes hazard ratio; CI, confidence interval; Cer, ceramide; SM, sphingomyelin.

\* measured in total phospholipids<sup>16</sup> (for example, correlation of Cer-16 and SM-16 with phospholipid 16:0, palmitic acid)

**Table S6. C-statistics from models of incident atrial fibrillation at 10 years.**

|             | 10 year            |                      |
|-------------|--------------------|----------------------|
|             | <u>C-statistic</u> | <u>% improvement</u> |
| Base model* | <b>0.669</b>       |                      |
| Cer-16      | 0.672              | 0.44%                |
| Cer-20      | 0.677              | 1.20%                |
| Cer-22      | 0.672              | 0.44%                |
| Cer-24      | 0.673              | 0.59%                |
| SM-16       | 0.674              | 0.70%                |
| SM-20       | 0.674              | 0.77%                |
| SM-22       | 0.674              | 0.70%                |
| SM-24       | 0.670              | 0.17%                |

\*Includes adjustment for age, sex, race, study site, body mass index, systolic blood pressure, treated hypertension, smoking, alcohol use, high-density lipoprotein, low-density lipoprotein, PR-interval, and prevalent diabetes, heart failure, and history of myocardial infarction.

Cer denotes ceramide; SM, sphingomyelin
